# Supplementary material for: The Concurrent Detection of Chelonid Alphaherpesvirus 5 and Chelonia mydas Papillomavirus 1 in Tumoured and Non-Tumoured Green Turtles
Source: Preprints.org preprint supplement (doi:10.20944/preprints202102.0235.v1), 2021-02-09
Supplement: Supplementary file 1 [file supplementary]

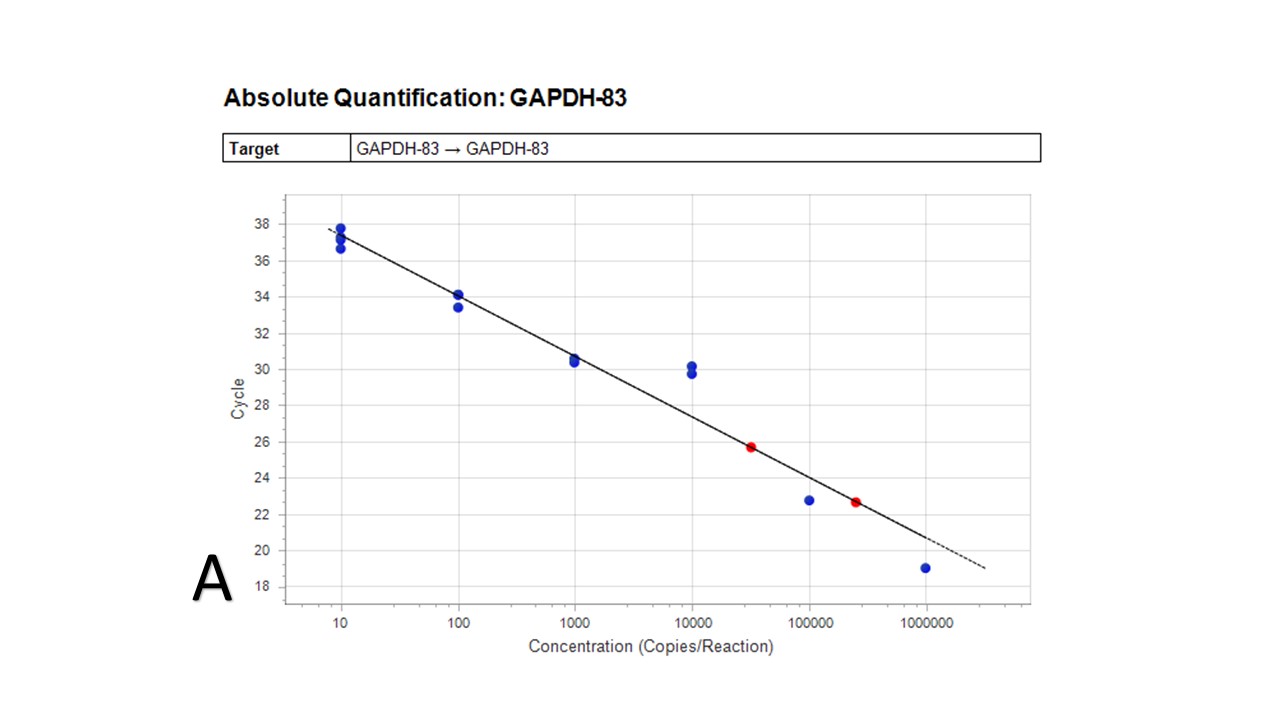
Supplementary Figures and Tables


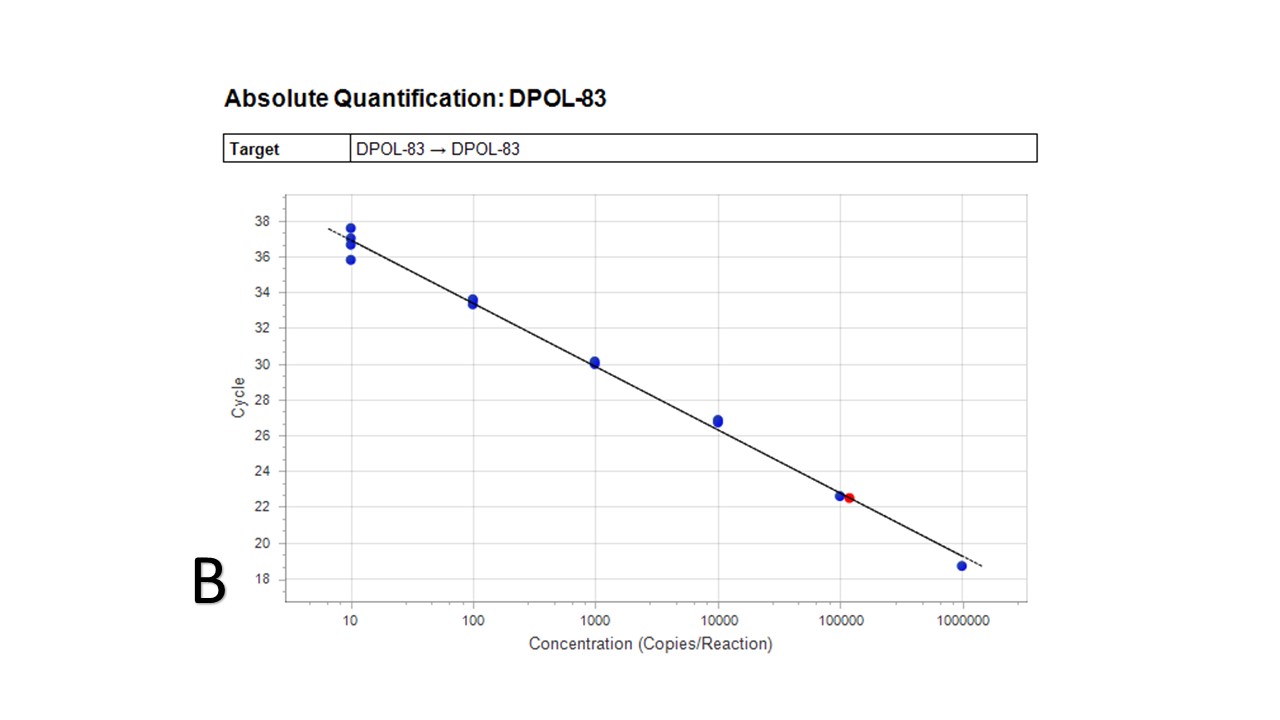


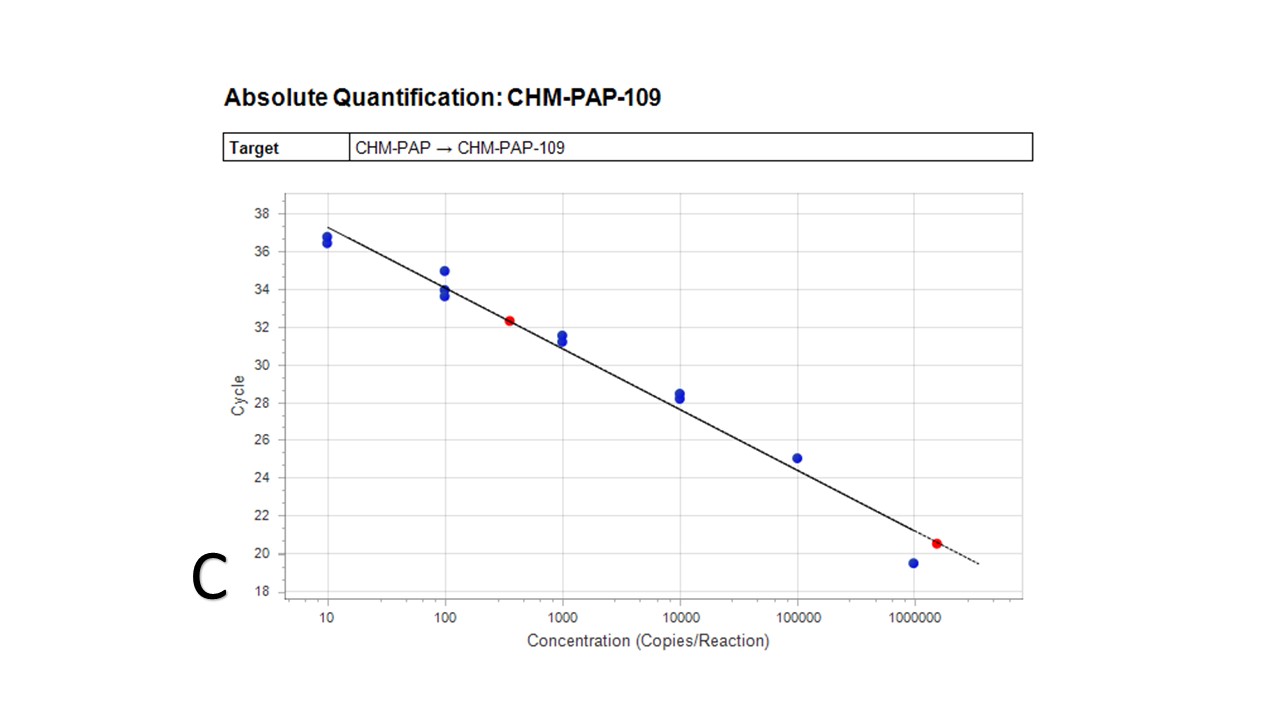


Figure S Absolute quantification and the standard curves for three cloned plasmids: A) GAPDH, B) ChHV5 Dpol and C) CmPV1-E1 were plotted based on the cycles (cq values) and the log of concentration (10 to 108 copies per reaction).

A

Table S The origin of FP tumour samples (Group A) used in this study, including location, turtle tag number, curved carapace length (CCL) and weight. All samples were collected from green turtles, excluding three samples from a green/hawksbill hybrid (*) and one sample from a loggerhead (**). The calculated concentration of each target is provided for each sample (where applicable). The copy number per cell of Chelonia mydas papillomavirus 1 (CmPV1) and/or Chelonid alphaherpesvirus 5 (ChHV5) is per sample (shown as appropriate).

|  |  | | **Demographic information (if available)** | | | **Calculated Concentration: copy number per reaction (2 µL)** | | | **Copy number per cell** | |
| --- | --- | --- | --- | --- | --- | --- | --- | --- | --- | --- |
| **Sample region** | **Sample ID** | **Tag number** | | **CCL (cm)** | **Weight (kg)** | **CmPV1** | **ChHV5** | **GAPDH** | **CmPV1** | **ChHV5** |
| Townsville | CB83FP | QA29610 | | 45.0 | 8.0 |  | 1.40E+06 | 1.10E+05 |  | 2.55E+01 |
| Townsville | CB93FP | QA36631 | | 59.6 | 29.0 |  | 878573.1 | 132187.1 |  | 13.29287 |
| Townsville | CB94FP | QA9554 | | 53.7 | 13.1 |  | 736462.9 | 56987.51 |  | 25.84647 |
| Townsville | CB95FP | QA29605 | | 57.5 | 22.0 |  | 102.1898 | 34.12851 |  | 5.98853 |
| Townsville | CB96FP | QA32170 | | 61.1 | 26.0 |  |  | 11295.94 |  |  |
| Townsville | CB97FP | K92985 | | 46.2 | - |  | 296245.1 | 39526.74 |  | 14.98961 |
| Townsville | CB98FP | QA15682 | | 49.7 | 10.6 |  | 20.40152 | 23485.09 |  | 0.001737 |
| Townsville | CB99FP1 | QA42017 | | 48.6 | 13.1 |  | 540504.7 | 171407.8 |  | 6.306654 |
| Townsville | CB99FP2 |  | |  |  | 54.67283 | 417018.6 | 108785.5 | 0.001005 | 7.666805 |
| Townsville | CB100FP? | QA38829 | | 42.0 | 8.2 |  | 21.44204 | 677.4224 |  | 0.063305 |
| Townsville | CB101FP1 | QA7433 | | 44.9 | 8.8 | 384.6 | 6.52E+05 | 1.36E+05 | 5.66E-03 | 9.59E+00 |
| Townsville | CB101FP2 |  | |  |  | 871.7 | 3.19E+06 | 1.95E+05 | 0.008945 | 32.69369 |
| Townsville | CB101FP3 |  | |  |  | 37.96307 | 921489.6 | 220937.9 | 0.000344 | 8.341616 |
| Townsville | CB102FP1 | QA47530 | | 48.1 | 12.7 | 702.1854 | 5360.511 | 67088.33 | 0.020933 | 0.159805 |
| Townsville | CB102FP2 |  | |  |  | 133.3026 | 6554.884 | 63568.35 | 0.004194 | 0.206231 |
| Townsville | CB102FP3 |  | |  |  | 5045 | 1125 | 6.47E+04 | 0.155999 | 0.034787 |
| Townsville | CB103FP1 | QA7392 | | 50.2 | 12.9 | 88.65 | 2.50E+05 | 2.58E+05 | 0.000689 | 1.937864 |
| Townsville | CB103FP2 |  | |  |  | 214.8988 | 434833 | 118051.5 | 0.003641 | 7.366834 |
| Townsville | CB103FP3 |  | |  |  | 163.0798 | 234421.1 | 44396.28 | 0.007347 | 10.5604 |
| Townsville | CB104FP1 | QA42248 | | 44.2 | 8.8 |  | 808530.2 | 151929.6 |  | 10.64349 |
| Townsville | CB104FP2 |  | |  |  |  | 134093.7 | 10722.72 |  | 25.01113 |
| Townsville | CB104FP3 |  | |  |  | 52.90798 | 245960 | 53662.31 | 0.001972 | 9.166954 |
| Townsville | CB105FP1 | QA38803 | | 50.5 | 13.4 | 74.3866 | 489490.7 | 147616.6 | 0.001008 | 6.631921 |
| Townsville | CB105FP2 |  | |  |  | 19.25 | 4.70E+05 | 2.96E+05 | 0.00013 | 3.175397 |
| Townsville | CB106FP1 | QA7381 | | 53.0 | 14.9 | 80.9203 | 186848.6 | 36285.02 | 0.00446 | 10.29894 |
| Townsville | CB106FP2 |  | |  |  | 328.3374 | 298552.9 | 30872.87 | 0.02127 | 19.34079 |
| Townsville | CB106FP3 |  | |  |  | 35.47351 | 119518.3 | 55331.87 | 0.001282 | 4.320054 |
| Townsville | CB107FP1 | QA7388 | | 49.5 | 13.1 |  | 470056.9 | 104041.2 |  | 9.035978 |
| Townsville | CB107FP2 |  | |  |  |  | 780594 | 1140585 |  | 1.368761 |
| Townsville | CB107FP3 |  | |  |  | 20.8703 | 252964.3 | 682013.6 | 6.12E-05 | 0.741816 |
| Townsville | CB108FP1 | QA42923 | | 43.6 | 6.5 |  | 198.266 | 9170.036 |  | 0.043242 |
| Townsville | CB108FP2 |  | |  |  | 17.05147 | 214.5014 | 26865.94 | 0.001269 | 0.015968 |
| Townsville | CB108FP3 |  | |  |  |  | 23.1668 | 1384.618 |  | 0.033463 |
| Townsville | CB109FP1 | QA38835 | | 50.3 | 15.3 | 694.8 | 1.96E+05 | 1.55E+06 | 0.000897 | 0.252421 |
| Townsville | CB109FP2 |  | |  |  | 477.2608 | 95185.5 | 59923.15 | 0.015929 | 3.176919 |
| Townsville | CB109FP3 |  | |  |  | 367.427 | 81824.71 | 46010.18 | 0.015972 | 3.556809 |
| Townsville | CB110FP1 | QA38827 | | 44.0 | 9.8 |  | 491515.1 | 176833.8 |  | 5.559063 |
| Townsville | CB110FP2 |  | |  |  | 27.00222 | 116724.7 | 49669.29 | 0.001087 | 4.700076 |
| Townsville | CB110FP3 |  | |  |  | 205.3986 | 795979.2 | 72820.47 | 0.005641 | 21.86141 |
| Townsville | CB111FP1 | QA36842 | | 46.3 | 12.5 |  | 522285.4 | 97321.2 |  | 10.73323 |
| Townsville | CB111FP2 |  | |  |  |  | 526739 | 97293.38 |  | 10.82785 |
| Townsville | CB111FP3 |  | |  |  |  | 626337.6 | 136207.9 |  | 9.196785 |
| Townsville | CB112FP1 | QA47488* | | 60.3 | 21.8 |  | 3219.141 | 61.73183 |  | 104.2943 |
| Townsville | CB112FP2 |  | |  |  |  | 23636.45 | 1442.775 |  | 32.76527 |
| Townsville | CB112FP3 |  | |  |  |  | 63443.51 | 3841.37 |  | 33.03171 |
| Townsville | CB113FP1 | No Tag | |  |  |  | 239.0367 | 46.51105 |  | 10.2787 |
| Townsville | CB113FP2 |  | |  |  |  | 141.8268 | 85.7317 |  | 3.30862 |
| Townsville | CB113FP3 |  | |  |  |  | 1974.158 | 270.6072 |  | 14.59058 |
| Townsville | CB114FP1 | QA62135 | | 48.0 | 9.7 | 59.85474 | 1338103 | 152347 | 0.000786 | 17.56652 |
| Townsville | CB114FP2 |  | |  |  | 88.32 | 2.13E+06 | 2.63E+05 | 0.000672 | 16.23431 |
| Townsville | CB114FP3 |  | |  |  | 227.478 | 478559.2 | 132242.7 | 0.00344 | 7.237587 |
| Townsville | CB115FP | QA9588 | |  |  |  | 836.8713 | 27311.15 |  | 0.061284 |
| Bowen | BW99FP | K59365 | | 46.5 | 11.6 | 206.0745 | 141624.4 | 62956.17 | 0.006547 | 4.499141 |
| Bowen | BW01FP | K52477 | | 48.4 | 12.0 | 523.4 | 8.714 | 7.88E+04 | 0.013286 | 0.000221 |
| Bowen | BW107FP | K97336 | | 25.7 | 10.5 | 36.6676 | 2008167 | 332241.6 | 0.000221 | 12.08859 |
| Bowen | BW108FP | QA15758 | | 49.4 | 13.0 | 10.60037 | 3566.926 | 17655.55 | 0.001201 | 0.404057 |
| Bowen | BW116FP | QA15730 | | 71.6 | 34.2 | 29.57064 |  | 1517.905 | 0.038962 |  |
| Bowen | BW117FP | QA15763 | | 58.0 | 21.9 |  |  | 323.4765 |  |  |
| Bowen | BW118FP | QA15774 | | 48.7 | 11.0 | 535.6 | 393.3 | 1.55E+06 | 0.000691 | 0.000507 |
| Bowen | BW119FP | QA15788 | | 53.3 | 15.6 | 222 |  | 1.85E+04 | 0.024 |  |
| Bowen | BW120FP | QA32132** | | 85.5 | 72.4 |  | 32681.3 | 664.4833 |  | 98.36606 |
| Bowen | BW121FP | QA36607 | | 73.1 | 43.0 |  |  | 26796.37 |  |  |
| Bowen | BW122FP | QA36634 | | 57.4 | 22.5 | 177.6 | 15.31 | 8.49E+04 | 0.004186 | 0.000361 |
| Bowen | BW123FP | QA7340 | | 45.3 | 10.2 |  | 381673.2 | 38733.7 |  | 19.70755 |
| Bowen | BW124FP1 | QA36626 | | 44.8 | - | 47.64 | 5.57E+04 | 3.01E+05 | 0.000317 | 0.370259 |
| Bowen | BW124FP2 |  | |  |  | 124.4032 | 9514.502 | 38719.79 | 0.006426 | 0.491454 |
| Bowen | BW125FP? | QA36635 | | 55.9 | 18.0 | 91.28411 |  | 1160.759 | 0.157284 |  |
| Bowen | BW126FP1 | QA36636 | | 47.6 | 11.8 | 139 | 540 | 6.37E+04 | 0.004365 | 0.016957 |
| Bowen | BW126FP2 |  | |  |  |  | 504.0661 | 32806.78 |  | 0.030729 |
| Bowen | BW127FP | K79524 | | 95.1 | 93.3 |  | 144.0536 | 465.1105 |  | 0.619438 |
| Bowen | BW128FP | K93052 | | 42.5 | 8.5 | 282.977 | 13146.21 | 56709.25 | 0.00998 | 0.463635 |
| Bowen | BW129FP | K94004 | | 62.1 | 28.0 | 58.69069 |  | 1059.89 | 0.110749 |  |
| Bowen | BW130FP | K97113 | | 47.9 | - | 34.98911 | 1500457 | 441319.3 | 0.000159 | 6.799871 |
| Bowen | BW131FP | K97114 | | 50.5 | - |  | 1001654 | 134246.2 |  | 14.92265 |
| Bowen | BW132FP | K97117 | | 45.0 | - |  | 1266036 | 66100.51 |  | 38.30639 |
| Bowen | BW134FP | K97287 | | 57.0 | - |  | 1161.984 | 423.0933 |  | 5.492801 |
| Bowen | BW135FP | K97288 | | 46.2 | - |  | 19154.51 | 823.3694 |  | 46.52715 |
| Bowen | BW136FP | K97289 | | 51.8 | - | 31.38807 | 977766.9 | 114030.7 | 0.000551 | 17.14919 |
| Bowen | BW137FP | QA15638 | | 48.6 | 11.0 |  | 711360.8 | 53662.31 |  | 26.51249 |
| Bowen | BW138FP | QA15672 | | 45.3 | 10.6 | 92.18531 |  | 218.2944 | 0.844596 |  |
| Bowen | BW139FP | QA15678 | | 76.2 | 43.6 | 81.8215 | 526334.1 | 116521.1 | 0.001404 | 9.034143 |
| Bowen | BW140FP | QA15761 | | 77.1 | 54.6 | 18.1 |  | 1.73E+05 | 0.000209 |  |
| Bowen | BW141FP | QA15787 | | 43.1 | 9.2 |  |  | 735.9959 |  |  |
| Bowen | BW142FP | QA15951 | | 45.4 | - |  | 1015825 | 112528.1 |  | 18.0546 |
| Bowen | BW143FP | QA24175 | | 45.5 | 9.7 | 48.73993 | 10522.63 | 23596.39 | 0.004131 | 0.891885 |
| Bowen | BW144FP | QA29702 | | 44.4 | 10.0 |  | 1783868 | 37523.27 |  | 95.08061 |
| Bowen | BW145FP | QA36630 | | 47.8 | 13.0 |  | 959.5476 | 73.93351 |  | 25.95704 |
| Bowen | BW146FP? | QA47548 | | 42.1 | 9.4 |  | 5716.798 | 116980.2 |  | 0.09774 |
| Bowen | BW147FP? | K52483 | | 52.3 | 14.8 |  |  | 40.52847 |  |  |
| Bowen | BW148FP? | K97048 | | 46.6 | - |  |  | 118.6637 |  |  |
| Bowen | BW149FP? | K97070 | | 69.8 | 35.7 |  |  | 218.5727 |  |  |
| Bowen | BW150FP? | QA15666 | | 46.9 | 12.0 |  | 108.8702 | 265.1811 |  | 0.821101 |
| Bowen | BW151FP | QA9536 | | 44.6 | 8.4 |  |  | 38.6224 |  |  |
| Bowen | BW151FP? |  | |  |  |  |  | 466.9192 |  |  |
| Bowen | BW152FP | K52464 | | 54.0 | - | 989.7 | 6731 | 4.58E+05 | 0.004327 | 0.029425 |
| Bowen | BW153FP | K92663 | | 44.7 | - | 56.70054 | 994366.6 | 649735.5 | 0.000175 | 3.060835 |
| Bowen | BW154FP | K93074 | | 45.0 | 11.0 |  | 1050644 | 2893897 |  | 0.72611 |
| Bowen | BW155FP | K93640 | | 47.9 | 11.8 |  | 3464088 | 1747469 |  | 3.964693 |
| Bowen | BW156FP | K97025 | | 48.1 | - | 2.74E+05 | 229.2 | 5.20E+05 | 1.052915 | 0.000882 |
| Bowen | BW158FP | K97483 | | 48.5 | - |  | 4198527 | 357145.9 |  | 23.51155 |
| Bowen | BW159FP | QA15979 | | 47.2 | - | 691.5 | 6.75E+07 | 1.07E+06 | 0.001289 | 125.8155 |
| Bowen | BW160FP | QA15980 | | 44.0 | - | 700.6 | 5.46E+06 | 6.30E+05 | 0.002224 | 17.33333 |
| Bowen | BW162FP | K93038 | |  |  | 289.6609 | 10591.46 | 396380.4 | 0.001462 | 0.053441 |
| Bowen | 9231 | 09-231 | | 57.1 | - |  | 7890963 | 1897729 |  | 8.316219 |
| Bowen | QA4962 |  | | 44.5 | - |  | 3593647 | 440901.9 |  | 16.30135 |
| Brisbane | MB01FP1 | No tag 1 | | 46.3 | - |  | 3357202 | 1426079 |  | 4.708297 |
| Brisbane | MB01FP2 |  | |  | - | 138.2 | 2.96E+06 | 2.63E+05 | 0.001052 | 22.53521 |
| Brisbane | MB01FP3 |  | |  | - | 76.03 | 3.60E+06 | 2.39E+05 | 0.000636 | 30.07525 |
| Brisbane | MB03FP1 | No tag 3 | | 44.4 |  |  | 1341747 | 380937 |  | 7.044456 |
| Brisbane | MB03FP2 |  | |  |  |  | 1085463 | 428380.2 |  | 5.067754 |
| Brisbane | MB03FP3 |  | |  |  |  | 1793180 | 168068.6 |  | 21.33866 |
| Brisbane | MB04FP1 | No tag 4 | | 43.1 | - |  | 1473331 | 644726.9 |  | 4.570403 |
| Brisbane | MB04FP2 |  | |  |  |  | 1671718 | 366606.7 |  | 9.119955 |
| Brisbane | MB05FP | QA45711 | | 52.1 | - |  | 526739 | 130350.6 |  | 8.081882 |
| Brisbane | MB06FP1 | K87178 | | 62.3 | - |  |  | 1102.324 |  |  |
| Brisbane | MB07FP1 | Kerry | |  |  | 30.86612 | 2760.825 | 24.33378 | 2.536895 | 226.913 |
| Brisbane | SW01FP1 | Alice | | 45.0 | - |  | 1464828 | 1452514 |  | 2.016956 |
| Brisbane | SW01FP2 |  | |  |  |  | 1200042 | 555127.4 |  | 4.323483 |
| Brisbane | SW02FP1 | Tay | | 52.4 | - |  | 421877 | 68090.06 |  | 12.39174 |
| Brisbane | SW02FP2 |  | |  |  | 69.20469 | 3409431 | 133954 | 0.001033 | 50.90448 |
| Gladstone | GS52FP1 | QA34793 | | 101.1 | 126.0 | 465.8 | 873.4 | 1.73E+05 | 0.005388 | 0.010103 |
| Gladstone | GS72FP | QA58207 | | 60.2 | 24.0 | 30.16769 | 124822.2 | 60702.27 | 0.000994 | 4.112603 |
| Gladstone | GS73FP | QA58252 | | 60.3 | 23.3 |  |  | 63999.65 |  |  |
| Gladstone | GS74FP | QA58271 | | 70.1 | 36.5 |  |  | 87067.35 |  |  |
| Cairns | CN01FP1 | Roxy | | 47.6 | - | 280.9117 | 15494467 | 295511.4 | 0.001901 | 104.8654 |
| Cairns | CN01FP2 |  | |  |  | 52.11943 | 4125650 | 1471992 | 7.08E-05 | 5.605533 |
| Cairns | CN02FP1 | Destiny | |  |  | 150.3 | 1.99E+05 | 5.35E+04 | 0.005621 | 7.430815 |
| Airlie Beach | AB01FP1 | No tag | | 49.0 | - |  | 615406.1 | 360485 |  | 3.414323 |
| Airlie Beach | AB01FP2 |  | |  |  | 163.9059 | 419042.9 | 345041.6 | 0.00095 | 2.428942 |
| Airlie Beach | AB01FP3 |  | |  |  | 57.86459 | 822700.7 | 397632.6 | 0.000291 | 4.137994 |
| Airlie Beach | AB01FP4 |  | |  |  |  | 868046.4 | 409597.7 |  | 4.238531 |

Table S The origin of samples of non-tumoured skin from turtles with FP tumours (Group B samples) used in this study, including location, turtle tag number, curved carapace length (CCL) and weight. All samples were collected from green turtles, excluding one sample from a loggerhead (Caretta caretta) (**). The calculated concentration of each target is provided for each sample (where applicable). The copy number per cell of Chelonia mydas papillomavirus 1 (CmPV1) and/or Chelonid alphaherpesvirus 5 (ChHV5) is per sample (shown as appropriate).

|  |  | **Demographic information (if available)** | | | **Calculated Concentration: copy number per reaction (2 µL)** | | | **Copy number per cell** | |
| --- | --- | --- | --- | --- | --- | --- | --- | --- | --- |
| **Sample region** | **Sample ID** | **Tag number** | **CCL (cm)** | **Weight (kg)** | **CmPV1** | **ChHV5** | **GAPDH** | **CmPV1** | **ChHV5** |
| Townsville | CB83N | QA29610 | 45.0 | 8.0 |  |  | 152.7935 |  |  |
| Townsville | CB99N | QA42017 | 48.6 | 13.1 |  |  | 4984.502 |  |  |
| Townsville | CB101N | QA7433 | 44.9 | 8.8 |  |  | 251.6029 |  |  |
| Townsville | CB102N | QA47530 | 48.1 | 12.7 |  |  | 9585.92 |  |  |
| Townsville | CB103N | QA7392 | 50.2 | 12.9 |  |  | 2382.61 |  |  |
| Townsville | CB104N | QA42248 | 44.2 | 8.8 |  |  | 6637 |  |  |
| Townsville | CB105N | QA38803 | 50.5 | 13.4 |  |  | 381.9397 |  |  |
| Townsville | CB106N | QA7381 | 53.0 | 14.9 |  | 14.03 | 2.06E+04 |  | 0.001361 |
| Townsville | CB107N | QA7388 | 49.5 | 13.1 |  |  | 152.7935 |  |  |
| Townsville | CB108N | QA42923 | 43.6 | 6.5 | 247 |  | 1.03E+04 | 0.047776 |  |
| Townsville | CB109N | QA38835 | 50.3 | 15.3 |  |  | 689.5522 |  |  |
| Townsville | CB110N | QA38827 | 44.0 | 9.8 |  |  | 168.9975 |  |  |
| Townsville | CB111N | QA36842 | 46.3 | 12.5 | 11.29 | 7756 | 2.01E+05 | 1.13E-04 | 0.077289 |
| Bowen | BW01N | K52477 | 48.4 | 12.0 |  |  | 1.59E+04 |  |  |
| Bowen | BW99N | K59365 | 46.5 | 11.6 | 5545 |  | 4.36E+04 | 0.254241 |  |
| Bowen | BW107N | K97336 | 25.7 | 10.5 |  |  | 1894.727 |  |  |
| Bowen | BW108N | QA15758 | 49.4 | 13.0 |  | 113 | 5107.794 | 0.000163 | 0.002029 |
| Bowen | BW116N | QA15730 | 71.6 | 34.2 |  |  | 4025.03 |  |  |
| Bowen | BW117N | QA15763 | 58.0 | 21.9 |  |  | 5270.715 |  |  |
| Bowen | BW118N | QA15774 | 48.7 | 11.0 |  |  | 2045.76 |  |  |
| Bowen | BW119N | QA15788 | 53.3 | 15.6 | 9.80E+04 |  | 2.60E+04 | 7.535563 |  |
| Bowen | BW120N | QA32132** | 85.5 | 72.4 | 29.30379 |  | 575.9478 | 0.101758 |  |
| Bowen | BW121N | QA36607 | 73.1 | 43.0 |  |  | 8326.585 |  |  |
| Bowen | BW122N | QA36634 | 57.4 | 22.5 | 6140 |  | 2.73E+04 | 0.450312 |  |
| Bowen | BW124N | QA36626 | 44.8 | - |  |  | 5151.827 |  |  |
| Bowen | BW125N | QA36635 | 55.9 | 18.0 | 46.79859 |  | 4460.513 | 0.020983 |  |
| Bowen | BW126N | QA36636 | 47.6 | 11.8 | 143.9676 |  | 4905.244 | 0.058699 |  |
| Bowen | BW145N | QA36630 | 47.8 | 13.0 |  |  | 559.6557 |  |  |
| Gladstone | GS52N | QA34793 | 101.1 | 126.0 | 5089 |  | 1.15E+05 | 0.088427 |  |
| Gladstone | GS72N | QA58207 | 60.2 | 24.0 |  |  | 3375.547 |  |  |
| Gladstone | GS73N | QA58252 | 60.3 | 23.3 |  |  | 2107.846 |  |  |
| Gladstone | GS74N | QA58271 | 70.1 | 36.5 |  |  | 2542.889 |  |  |
| Brisbane | MB01N | No tag 1 | 46.3 | - |  | 25.52748 | 47467.26 |  | 0.001076 |
| Brisbane | MB03N | No tag 3 | 44.4 | - |  |  | 1.04E+04 |  |  |
| Brisbane | MB05N | QA45711 | 52.1 | - |  |  | 2341.659 |  |  |
| Brisbane | MB06N | K87178 | 62.3 | - |  |  | 638.0339 |  |  |

Table S The origin of samples of non-tumoured skin from turtles without FP tumours (Group C samples) used in this study, including location, turtle tag number, curved carapace length (CCL) and weight. All samples were collected from green turtles. The calculated concentration of each target is provided for each sample (where applicable). The copy number per cell of Chelonia mydas papillomavirus 1 (CmPV1) and/or Chelonid alphaherpesvirus 5 (ChHV5) is per sample (shown as appropriate).

|  |  | **Demographic information (if available)** | | | **Calculated Concentration: copy number per reaction (2 µL)** | | | **Copy number per cell** | |
| --- | --- | --- | --- | --- | --- | --- | --- | --- | --- |
| **Sample region** | **Sample ID** | **Tag number** | **CCL (cm)** | **Weight (kg)** | **CmPV1** | **ChHV5** | **GAPDH** | **CmPV1** | **ChHV5** |
| Townsville | CB01 | QA32220 | 44.7 | 9.6 |  |  | 7.47E+10 |  |  |
| Townsville | CB02 | K92947/QA29615 | 47.4 | 10.0 |  |  | 1054004 |  |  |
| Townsville | CB03 | QA32265 | 48.3 | 48.0 | 472.9 |  | 1.75E+11 | 5.42E-09 |  |
| Townsville | CB04 | QA29616 | 66.4 | 30.0 |  |  | 4.71E+10 |  |  |
| Townsville | CB05 | K56931 | 46.6 | 12.0 |  |  | 2.03E+11 |  |  |
| Townsville | CB06 | K18987 | 46.3 | 11.0 |  |  | 9.76E+09 |  |  |
| Townsville | CB07 | QA29706 | 42.7 | 8.2 |  |  | 115230.7 |  |  |
| Townsville | CB09 | QA32222 | 54.3 | 17.1 | 135.2 |  | 415974.6 | 0.00065 |  |
| Townsville | CB10 | QA29603 | 48.4 | 13.0 |  |  | 1750133 |  |  |
| Townsville | CB11 | QA29709 | 62.5 | - |  |  | 1038195 |  |  |
| Townsville | CB12 | QA9469 | 45.2 | 9.5 |  |  | 210205 |  |  |
| Townsville | CB13 | QA29712 | 75.7 | - |  |  | 147270.7 |  |  |
| Townsville | CB14 | QA29711 | 45.4 | 10.8 |  |  | 187592.2 |  |  |
| Townsville | CB16 | QA29604 | 52.2 | 16.5 |  |  | 261816.5 |  |  |
| Townsville | CB18 | QA29707 | 48.0 | 13.6 |  |  | 599831.6 |  |  |
| Townsville | CB20 | QA32206 | 46.9 | 10.5 | 135.8 |  | 782863.6 | 0.000347 |  |
| Townsville | CB21 | QA29601 | 48.6 | 13.0 |  |  | 271393.4 |  |  |
| Townsville | CB22 | K90948 | 43.2 | 9.0 | 7452 |  | 182648.2 | 0.0816 |  |
| Townsville | CB23 | QA32212 | 42.2 | 8.8 | 546.1 |  | 202033.1 | 0.005406 |  |
| Townsville | CB24 | QA32215 | 69.4 | - |  |  | 291322.8 |  |  |
| Townsville | CB25 | QA32213 | 46.5 | 10.8 |  |  | 1.75E+11 |  |  |
| Townsville | CB26 | QA9595 | 50.9 | 15.0 |  |  | 4.71E+10 |  |  |
| Townsville | CB27 | QA29605 | 57.4 | 22.0 |  |  | 2.03E+11 |  |  |
| Townsville | CB28 | K92803 | 83.2 | - |  |  | 9.76E+09 |  |  |
| Townsville | CB29 | K92644 | 60.0 | - |  |  | 1.09E+10 |  |  |
| Townsville | CB30 | K92999 | 47.2 | - | 240.7 |  | 484542.3 | 0.000994 |  |
| Townsville | CB31 | QA32211/K40368 | 44.2 | 8.5 | 107 |  | 759056.1 | 0.000282 |  |
| Townsville | CB32 | K59356 | 45.2 | 10.2 | 653.4 |  | 1581766 | 0.000826 |  |
| Townsville | CB33 | QA29620 | 48.7 | 14.5 |  |  | 87366.36 |  |  |
| Townsville | CB34 | K92670 | 70.8 | - |  |  | 317240.5 |  |  |
| Townsville | CB35 | QA32242 | 85.8 | - |  | 88.7 | 1046292 |  | 0.00017 |
| Townsville | CB36 | QA32275 | 73.6 | - |  | 2.22E+05 | 116871.9 |  | 3.792186 |
| Townsville | CB37 | QA32250 | 86.6 | - |  | 55.47 | 125619.5 |  | 0.000883 |
| Townsville | CB38 | QA32234 | 71.8 | - |  |  | 698437.2 |  |  |
| Townsville | CB39 | K92985 | 46.2 | - |  |  | 144322.9 |  |  |
| Townsville | CB40 | QA15846 | 103.9 | - |  |  | 115230.7 |  |  |
| Townsville | CB41 | K90921 | 40.8 | 7.1 |  |  | 69273.49 |  |  |
| Townsville | CB42 | QA15682 | 49.7 | 10.6 |  |  | 274325.9 |  |  |
| Townsville | CB43 | K92980 | 46.4 | 9.6 |  |  | 176742.8 |  |  |
| Townsville | CB44 | QA32300 | 48.5 | 11.8 |  |  | 162074.6 |  |  |
| Townsville | CB45 | K92981 | 50.7 | 11.9 | 87.23 |  | 254332.9 | 0.000686 |  |
| Townsville | CB46 | K92982 | 45.2 | 9.1 |  |  | 374370.4 |  |  |
| Townsville | CB47 | K92990 | 74.6 | - | 1189 |  | 283515.5 | 0.008388 |  |
| Townsville | CB48 | QA9280 | 100.9 | - |  |  | 1.52E+05 |  |  |
| Townsville | CB49 | QA36779 | 46.6 | - |  |  | 1.1E+09 |  |  |
| Townsville | CB50 | QA9279 | 48.8 | - |  |  | 1.09E+10 |  |  |
| Townsville | CB51 | QA9528 | 43.9 | - |  |  | 4.39E+05 |  |  |
| Townsville | CB52 | QA9283 | 46.3 | - |  |  | 3.93E+05 |  |  |
| Townsville | CB53 | K88974 | 68.5 | - |  |  | 6.11E+05 |  |  |
| Townsville | CB54 | K92949 | 48.9 | 12.1 |  |  | 115230.7 |  |  |
| Townsville | CB55 | QA9277 | 47.8 | - |  |  | 5.97E+10 |  |  |
| Townsville | CB56 | K74948 | 55.7 | - |  | 131.6 | 9.95E+05 |  | 0.000264 |
| Townsville | CB57 | QA36799 | 50.4 | - |  | 1.42E+05 | 1.44E+11 |  | 1.97E-06 |
| Townsville | CB58 | QA36776 | 93.2 | - |  |  | 3.81E+10 |  |  |
| Townsville | CB59 | QA36778 | 108.1 | - |  |  | 1.46E+11 |  |  |
| Townsville | CB60 | K92989 | 68.7 | - | 106.6 |  | 6.84E+09 | 3.12E-08 |  |
| Bowen | BW02 | QA15707 | 46.8 | 10.8 |  |  | 3.23E+05 |  |  |
| Bowen | BW03 | QA29729 | 45.9 | 11.4 |  |  | 1.18E+06 |  |  |
| Bowen | BW04 | QA36605 | 113.9 | 130+ |  |  | 7.21E+05 |  |  |
| Bowen | BW05 | QA15776 | 45.0 | 8.7 | 1424 |  | 1.69E+05 | 0.016902 |  |
| Bowen | BW06 | QA15785 | 49.1 | 10.5 |  |  | 1.07E+05 |  |  |
| Bowen | BW07 | K59353 | 60.6 | 21.9 | 12.63 |  | 1.45E+05 | 0.000175 |  |
| Bowen | BW08 | K59391 | 45.5 | 9.5 | 93.03 |  | 1.58E+05 | 0.001181 |  |
| Bowen | BW09 | K92959 | 42.5 | 7.7 |  |  | 1.90E+05 |  |  |
| Bowen | BW10 | QA15796 | 54.0 | 17.5 | 25.13 |  | 3.04E+05 | 0.000165 |  |
| Bowen | BW11 | QA36603 | 80.5 | 48.0 |  |  | 4.39E+05 |  |  |
| Bowen | BW12 | QA36606 | 85.7 | 61.0 |  | 164.4 | 3.93E+05 |  | 0.000838 |
| Bowen | BW13 | QA15777 | 44.4 | 7.9 |  |  | 6.11E+05 |  |  |
| Bowen | BW14 | QA32125 | 42.3 | 9.1 |  |  | 2.13E+05 |  |  |
| Bowen | BW15 | QA32123 | 48.1 | 12.6 |  |  | 1.58E+05 |  |  |
| Bowen | BW16 | QA15968 | 47.0 | 11.6 |  |  | 1.64E+05 |  |  |
| Bowen | BW17 | K52467 | 58.5 | 22.2 | 1.36E+04 |  | 2.38E+05 | 0.114262 |  |
| Bowen | BW18 | K94004 | 63.0 | 25.1 | 6286 |  | 8.93E+04 | 0.140863 |  |
| Bowen | BW19 | K92945 | 46.0 | 10.2 | 67.85 |  | 4.44E+04 | 0.003056 |  |
| Bowen | BW20 | QA15794 | 49.0 | 12.1 | 11.21 |  | 5.08E+04 | 0.000442 |  |
| Bowen | BW21 | QA15782 | 58.0 | 19.3 | 105.2 |  | 1.82E+05 | 0.001154 |  |
| Bowen | BW22 | QA15799 | 64.0 | 23.6 | 100.2 |  | 2.54E+05 | 0.00079 |  |
| Bowen | BW23 | K97074 | 97.0 | 97.1 |  | 4129 | 3.86E+05 |  | 0.021394 |
| Bowen | BW24 | QA15769 | 97.0 | 100.2 | 12.95 |  | 5.81E+05 | 4.46E-05 |  |
| Bowen | BW25 | K97161 | 89.0 | 74.8 |  | 29.07 | 1.29E+06 |  | 4.50E-05 |
| Bowen | BW26 | QA15732 | 82.3 | 60.8 |  | 46.72 | 7.40E+04 |  | 0.001263 |
| Bowen | BW27 | QA10912 | 103.3 | 126.5 | 21.16 |  | 3.20E+05 | 0.000132 |  |
| Bowen | BW28 | QA15748 | 97.5 | 94.0 | 504.9 |  | 1.00E+06 | 0.001006 |  |
| Bowen | BW29 | QA15746 | 106.5 | 134.3 |  |  | 1.21E+05 |  |  |
| Bowen | BW30 | K97284 | 53.8 | 13.3 | 13.29 | 8401 | 1.43E+05 | 0.000185 | 0.117251 |
| Bowen | BW31 | QA15733 | 64.5 | 30.9 |  |  | 6.00E+05 |  |  |
| Bowen | BW32 | QA15766 | 43.7 | 8.5 |  |  | 1.37E+05 |  |  |
| Bowen | BW33 | QA15740 | 65.9 | 29.5 |  |  | 1.19E+05 |  |  |
| Bowen | BW34 | K59377 | 44.5 | 10.1 |  | 17.18 | 7.21E+04 |  | 0.000476 |
| Bowen | BW35 | QA15717 | 47.6 | 10.3 |  |  | 2.60E+05 |  |  |
| Bowen | BW36 | QA15709 | 44.4 | 8.3 | 38.34 | 11.1 | 1.51E+05 | 0.000506 | 0.000147 |
| Bowen | BW37 | K59378 | 47.5 | 12.2 | 208.2 |  | 1.55E+05 | 0.00268 |  |
| Bowen | BW38 | QA15718 | 49.2 | 13.7 | 276.1 |  | 2.47E+05 | 0.00224 |  |
| Bowen | BW39 | QA15770 | 44.5 | 8.2 | 54.92 |  | 3.59E+05 | 0.000306 |  |
| Bowen | BW40 | QA15775 | 43.5 | 10.0 |  |  | 2.92E+05 |  |  |
| Bowen | BW41 | QA15747 | 45.1 | 10.0 | 18.55 |  | 1.52E+05 | 0.000244 |  |
| Bowen | BW42 | QA15710 | 56.5 | 16.9 |  |  | 1.02E+09 |  |  |
| Bowen | BW43 | QA15764 | 47.5 | 12.5 | 27.08 |  | 7.30E+08 | 7.42E-08 |  |
| Bowen | BW44 | QA15767 | 49.3 | 13.9 |  |  | 6.14E+08 |  |  |
| Bowen | BW45 | K97135 | 46.8 | 12.5 | 129.3 | 1143 | 1.11E+08 | 2.34E-06 | 2.07E-05 |
| Bowen | BW46 | QA15731 | 55.0 | 19.9 | 3.66E+04 |  | 2.26E+08 | 0.000324 |  |
| Bowen | BW47 | QA15736 | 41.2 | 7.4 | 46.8 |  | 1.15E+07 | 8.13E-06 |  |
| Bowen | BW48 | K59376 | 57.5 | 18.9 | 696.7 |  | 9.07E+08 | 1.54E-06 |  |
| Bowen | BW49 | QA15771 | 47.4 | 11.2 | 108.4 |  | 1.85E+09 | 1.18E-07 |  |
| Bowen | BW50 | K59383 | 45.8 | 9.9 | 75.02 |  | 1.04E+08 | 1.44E-06 |  |
| Bowen | BW51 | K59381 | 48.4 | 13.0 | 111.8 |  | 3.82E+07 | 5.85E-06 |  |
| Bowen | BW52 | QA32101 | 44.7 | 10.5 | 275.4 |  | 8.65E+07 | 6.37E-06 |  |
| Bowen | BW53 | QA29752 | 42.7 | 9.8 | 1043 |  | 1.74E+08 | 1.20E-05 |  |
| Bowen | BW54 | K52467 | 57.4 | 21.8 | 194.3 |  | 3.27E+08 | 1.19E-06 |  |
| Bowen | BW55 | QA15783 | 44.8 | 11.8 | 186.7 |  | 5.59E+08 | 6.69E-07 |  |
| Bowen | BW56 | K52461 | 61.5 | 28.0 |  |  | 1.64E+09 |  |  |
| Bowen | BW57 | K59382 | 58.0 | 22.0 | 973.7 |  | 4.89E+08 | 3.98E-06 |  |
| Bowen | BW58 | QA36658 | 44.1 | 10.0 | 112.1 |  | 2.58E+09 | 8.70E-08 |  |
| Bowen | BW59 | QA36604 | 46.8 | 11.0 |  |  | 1.66E+08 |  |  |
| Bowen | BW60 | QA36612 | 93.5 | 86.0 | 35.99 |  | 4.64E+07 | 1.55E-06 |  |
| Bowen | BW61 | QA36655 | 45.5 | 12.0 |  |  | 3.55E+08 |  |  |
| Bowen | BW62 | QA36820 | 46.7 | 13.0 | 61.73 |  | 1.27E+09 | 9.75E-08 |  |
| Bowen | BW63 | QA32124 | 57.0 | 22.5 | 539.8 | 952.4 | 7.63E+07 | 1.42E-05 | 2.50E-05 |
| Bowen | BW64 | QA24108 | 48.6 | 12.6 | 1.02E+04 |  | 4.74E+08 | 4.31E-05 |  |
| Bowen | BW65 | QA29731 | 65.6 | 34.5 | 220.7 | 11.16 | 4.91E+08 | 9.00E-07 | 4.55E-08 |
| Bowen | BW66 | QA15716 | 67.8 | 34.0 | 29.72 |  | 2.00E+08 | 2.97E-07 |  |
| Bowen | BW67 | QA36625 | 55.1 | 23.0 | 1318 |  | 5.57E+08 | 4.73E-06 |  |
| Bowen | BW68 | QA32120 | 56.5 | 20.4 | 1848 |  | 6.34E+08 | 5.83E-06 |  |
| Bowen | BW69 | QA29745 | 50.6 | 14.5 | 3.36E+05 |  | 6.83E+08 | 0.000983 |  |
| Bowen | BW70 | QA36611 | 51.6 | 14.5 |  |  | 4.33E+08 |  |  |
| Bowen | BW71 | QA32122 | 37.2 | 13.1 | 91.59 |  | 1.86E+07 | 9.83E-06 |  |
| Bowen | BW72 | QA36608 | 43.7 | 12.5 | 467.6 |  | 4.80E+08 | 1.95E-06 |  |
| Bowen | BW73 | QA36656 | 43.5 | 10.2 | 86.26 |  | 3.95E+08 | 4.37E-07 |  |
| Bowen | BW74 | QA29730 | 44.2 | 10.7 | 933.8 |  | 6.39E+08 | 2.92E-06 |  |
| Bowen | BW75 | QA36676 | 44.3 | 9.5 | 52.07 |  | 1.28E+08 | 8.16E-07 |  |
| Bowen | BW76 | QA36679 | 45.8 | 9.0 | 96.83 |  | 3.15E+08 | 6.15E-07 |  |
| Bowen | BW77 | QA36677 | 43.0 | 10.0 | 33.6 | 484.6 | 4.24E+07 | 1.59E-06 | 2.29E-05 |
| Bowen | BW78 | QA36684 | 51.4 | 16.0 | 253.5 |  | 7.92E+07 | 6.40E-06 |  |
| Bowen | BW79 | QA15641 | 53.6 | 17.6 | 2009 |  | 6.74E+08 | 5.96E-06 |  |
| Bowen | BW80 | QA32109 | 43.7 | 20.6 |  | 1.97E+04 | 1.10E+09 |  | 3.60E-05 |
| Bowen | BW81 | QA32104 | 47.5 | 21.6 | 28.97 |  | 3.33E+08 | 1.74E-07 |  |
| Gladstone | GS01 | QA33350 | 42.1 | 7.5 |  |  | 2.51E+10 |  |  |
| Gladstone | GS02 | QA33349 | 42.5 | 8.9 |  | 3.64E+04 | 4.13E+12 |  | 1.76E-08 |
| Gladstone | GS03 | QA33342 | 111.0 | 153.0 |  | 2217 | 7.47E+11 |  | 5.93E-09 |
| Gladstone | GS04 | QA33363 | 107.4 | 141.0 |  | 1579 | 7.07E+12 |  | 4.47E-10 |
| Gladstone | GS05 | QA33340 | 96.3 | 97.0 |  | 36.32 | 1.56E+12 |  | 4.66E-11 |
| Gladstone | GS06 | QA33373 | 99.4 | 117.0 |  |  | 2.13E+12 |  |  |
| Gladstone | GS07 | QA33352 | 88.3 | 94.0 |  | 601.9 | 6.42E+10 |  | 1.88E-08 |
| Gladstone | GS08 | QA33341 | 95.1 | 88.0 |  | 1186 | 4.72E+11 |  | 5.03E-09 |
| Gladstone | GS09 | QA33332 | 79.6 | 55.0 |  | 327.7 | 2.47E+12 |  | 2.66E-10 |
| Gladstone | GS10 | QA33330 | 98.0 | 108.0 |  | 666.4 | 2.52E+12 |  | 5.29E-10 |
| Gladstone | GS11 | QA33357 | 106.0 | 128.0 |  | 6170 | 1.28E+12 |  | 9.66E-09 |
| Gladstone | GS12 | QA33343 | 95.4 | 97.0 |  | 2.19E+05 | 1.82E+12 |  | 2.40E-07 |
| Gladstone | GS13 | QA39981 | 100.3 | 103.0 |  | 5.44E+04 | 2.12E+12 |  | 5.12E-08 |
| Gladstone | GS14 | QA33354 | 87.1 | 66.0 |  | 183.2 | 3.24E+12 |  | 1.13E-10 |
| Gladstone | GS15 | QA33333 | 79.7 | 53.5 |  | 1845 | 4.44E+12 |  | 8.31E-10 |
| Gladstone | GS16 | QA33329 | 63.9 | 30.0 |  |  | 5.01E+12 |  |  |
| Gladstone | GS17 | QA34529 | 47.9 | 11.8 |  |  | 3.38E+14 |  |  |
| Gladstone | GS18 | QA33337 | 48.5 | 14.1 |  |  | 2.70E+10 |  |  |
| Gladstone | GS19 | QA33370 | 47.5 | 11.4 |  | 536.4 | 1.21E+07 |  | 8.87E-05 |
| Gladstone | GS20 | QA33365 | 60.0 | 22.9 |  |  | 2.38E+11 |  |  |
| Gladstone | GS21 | QA33368 | 46.0 | 11.8 |  |  | 9.38E+07 |  |  |
| Gladstone | GS22 | QA33367 | 52.1 | 17.0 |  |  | 5.77E+12 |  |  |
| Gladstone | GS23 | QA33375 | 49.1 | 14.7 |  | 216.3 | 3.52E+08 |  | 1.23E-06 |
| Gladstone | GS24 | K70229 | 105.7 | 142.0 |  | 110.9 | 4.51E+12 |  | 4.92E-11 |
| Gladstone | GS25 | QA43067 | 105.7 | 140.0 |  |  | 176742.8 |  |  |
| Gladstone | GS26 | QA43063 | 93.5 | 93.0 |  |  | 162074.6 |  |  |
| Gladstone | GS27 | QA43068 | 96.1 | 106.0 |  |  | 254332.9 |  |  |
| Gladstone | GS28 | QA43065 | 97.7 | 96.0 |  |  | 2.52E+12 |  |  |
| Gladstone | GS29 | QA43056 | 52.7 | 17.8 |  |  | 1.28E+12 |  |  |
| Gladstone | GS30 | QA43061 | 84.3 | 75.0 |  |  | 1.82E+12 |  |  |
| Gladstone | GS31 | QA43060 | 74.8 | 45.0 |  |  | 5.56E+13 |  |  |
| Gladstone | GS32 | QA43055 | 85.1 | 75.0 |  |  | 1.54E+12 |  |  |
| Gladstone | GS33 | QA43058 | 88.7 | 72.0 |  | 14.38 | 1.15E+12 |  | 2.49E-11 |
| Gladstone | GS34 | QA43059 | 99.5 | 120.0 |  |  | 7.55E+11 |  |  |
| Gladstone | GS35 | QA27998 | 41.6 | 7.6 | 385.5 |  | 1.31E+10 | 5.89E-08 |  |
| Gladstone | GS36 | QA43053 | 44.5 | 8.6 | 6688 |  | 1.90E+11 | 7.05E-08 |  |
| Gladstone | GS37 | QA27997 | 60.0 | 19.0 | 141.9 |  | 4.15E+10 | 6.84E-09 |  |
| Gladstone | GS38 | QA43044 | 43.1 | 6.5 |  |  | 5.37E+09 |  |  |
| Gladstone | GS39 | QA43043 | 42.6 | 6.2 |  |  | 4.01E+10 |  |  |
| Gladstone | GS40 | QA43023 | 102.7 | 131.0 |  |  | 1.04E+12 |  |  |
| Gladstone | GS41 | QA43031 | 59.8 | 26.0 |  |  | 7.64E+09 |  |  |
| Gladstone | GS42 | QA43022 | 90.6 | 82.0 |  | 18.86 | 1.09E+10 |  | 3.45E-09 |
| Gladstone | GS43 | QA43033 | 56.0 | 21.0 |  | 169.2 | 2.59E+09 |  | 1.31E-07 |
| Gladstone | GS44 | QA43036 | 80.6 | 64.0 | 66.39 | 8356 | 2.12E+09 | 6.27E-08 | 7.89E-06 |
| Gladstone | GS45 | QA43041 | 94.3 | 92.0 |  | 850.8 | 3.37E+09 |  | 5.05E-07 |
| Gladstone | GS46 | QA43003 | 43.3 | 8.8 |  | 86.45 | 5.58E+07 |  | 3.10E-06 |
| Gladstone | GS47 | QA43004 | 93.8 | 104.0 |  |  | 7.38E+09 |  |  |
| Gladstone | GS48 | QA43035 | 64.6 | 32.0 |  |  | 9.29E+09 |  |  |
| Gladstone | GS49 | QA34580 | 46.2 | 10.8 | 62.42 |  | 6.22E+06 | 2.01E-05 |  |
| Gladstone | GS50 | QA34576 | 43.4 | 9.9 | 593.1 |  | 1.09E+10 | 2.09E-03 |  |

Table S The average copy number of ChHV5 in various units calculated in different studies in comparison to the current study

The copy number per reaction of GAPDH is consistent in samples from green turtles with and without FP tumours. In other words, there is no significant difference between the quantities of tissues used for the qPCR reactions and subsequently viral load comparison (P value: 0.282). As the starting tissue mass appeared to be similar in samples, after calculating the DNA extraction elute volume (50µL of extracted DNA in DNase free water to 20µL of PCR reaction) the estimated mean of ChHV5 viral loads appears to be approximately 3.707×105 copies/µL of DNA extract from tumour tissues. This unit calculation enabled us to compare our results of ChHV5 viral loads with previous studies that used different protocols and calculated copies/cell, copies/µL of samples in PCR reaction or copies/µgr of DNA (Table S7). Overall, the results in this study are consistent with studies in other regions.

|  |  | | Quackenbush *et al.,* 2001 | Greenblatt, *et al.,* 2005 | Page-Karjian *et al.,* 2015 | Alfaro-Núñez *et al.,* 2016 | Current study |
| --- | --- | --- | --- | --- | --- | --- | --- |
| FP-afflicted turtles | FP Tumour Samples (Group A in the present study) | Copies/cell | 15.21 | 13.9 | - | 15.61 ± 12.5 | 15.635± 30.152 |
| copies/µL of samples in PCR reaction | - | - | - | 4.9×104 | 4.297×105 |
| copies/µg of DNA | 3.3× 104 to 4.9× 106 | - | 3.24 × 108  (1.6 × 103 -2.0 × 109) | - | 5.367×105 |
| Non-tumoured skin from turtles with FP tumours (Group B in the present study) | Copies/cell | - | 0.03$ | - | 0.02 ± 0.00 | 0.020± 0.0379 |
| copies/µL of samples in PCR reaction | - | - | - | 1.8×101 | 1.818×102 |
| copies/µg of DNA | 122 ± 82.67 | - | 22722  (2.5 × 102 - 7.1 × 104) | - | 2.272×103 |
| Non-tumoured turtles (Group C in the present study) | | Copies/cell | - | - | - | 6.03 | 0.100± 0.606 |
| copies/µL of samples in PCR reaction | - | - | - | 5.8×104 | 2.614×103 |
| copies/µg of DNA | - | - | 5463  (6.0 × 102 - 1.7 × 104) | - | 3.269×103 |
